# Supplementary material
Source: PubMed Central journal article supplement (PMC4326039)
Supplement: NIHMS657267-supplement-supplement_1.pdf [file NIHMS657267-supplement-supplement_1.pdf]

## Supplementary Materials and Methods

### *DT Treatment*

To induce DTR expression globally in the pancreas, we crossed R26<sup>DTR</sup> or R26<sup>DTR/lacZ</sup> with PdxCre mice. Eight-week-old mice were injected intraperitoneally daily for 5 days with 0.5 ng/g body wt DT (Sigma-Aldrich, St Louis, MO) and killed at different time points up to 45 days after DT administration (Supplementary Figure 1A). Throughout this report, days 1 to 7, 8 to 25, and 26 to 45 after last DT injections are referred to as early, mid, and late stages, respectively, because of variable progression of the phenotype after ablation.

To allow DTR expression selectively in acinar cells, we crossed R26<sup>DTR</sup> or R26<sup>DTR/lacZ</sup> with ElaCreERT2 mice. Eight-week-old mice were first injected intraperitoneally with tamoxifen for 5 days to activate Cre. After a 7-day wait to allow for Cre-recombinase action, 0.5 ng/g body wt DT injections were performed for 5 consecutive days. Mice were killed 1, 3, 5, 7, or 8 days after DT administration (Supplementary Figure 1B).

### *Tamoxifen Treatment*

Tamoxifen (Sigma-Aldrich) was dissolved in 100% ethanol at 100 mg/mL and subsequently resuspended in corn oil (Sigma-Aldrich) at a concentration of 10 mg/mL. Six-week-old mice were injected intraperitoneally with 2 mg tamoxifen for 5 consecutive days, for a total of 10 mg.

### *Immunofluorescence*

For immunolabeling on cryopreserved sections, harvested pancreata were fixed overnight at 4°C in 4% paraformaldehyde, incubated in 30% sucrose solution overnight at 4°C, and subsequently embedded with OCT compound. Cryosections (5–6 μm) were collected serially so that each slide would contain semiadjacent sections across the entire tissue. Sections were permeabilized with 0.1% phosphate-buffered saline (PBS)/Triton X-100, washed in PBS, and blocked for 30 minutes in 10% normal donkey serum in 0.1% PBS/Tween. For BrdU staining, slides were pretreated with 2 mol/L HCl for 30 minutes at room temperature before permeabilization and blocking. For cytokeratin-19 staining, tissues were snap frozen in OCT and sections were subsequently fixed in 4% paraformaldehyde at room temperature for 10 minutes before permeabilization and blocking. Primary antibodies were incubated overnight at 4°C, whereas secondary antibodies were incubated for 1 hour at room temperature. Images were acquired on a Zeiss Imager Z1 microscope with a Zeiss AxioCam driven by Zeiss AxioVision Rel.4.7 software (Zeiss, Thornwood, NY).

For quantification analysis, marker<sup>+</sup> cells were counted using ImageJ software.

The sources of antibodies and dilutions used are summarized in Supplementary Table 1.

### *H&E Staining*

For H&E staining, tissues were fixed in 4% paraformaldehyde, dehydrated in ethanol, and paraffin embedded. H&E staining was performed on 5-μm-thick sections according to standard protocol.

### *X-gal Staining*

For β-galactosidase staining (X-gal staining), tissues were fixed at room temperature for 2 hours in 2% paraformaldehyde, washed in PBS and Rinse Buffer (2 mmol/L MgCl<sub>2</sub>, 0.01% sodium deoxycholate, 0.02% Nonidet P-40 in PBS), and then incubated overnight at 37°C with X-gal solution (1 mg/mL X-gal [Research Products International Corp, Mount Prospect, IL], 5 mmol/L K<sub>4</sub>Fe(CN)<sub>6</sub>, 5 mmol/L K<sub>3</sub>Fe(CN)<sub>6</sub> in Rinse Buffer). Following washes in PBS, tissues were postfixed in 4% paraformaldehyde at room temperature for 10 minutes, incubated in 30% sucrose solution overnight, and subsequently embedded with OCT compound. Cryosections were prepared as described for immunolabeling and counterstained with hematoxylin.

### *BrdU Labeling (Pulse-Chase) and Terminal Deoxynucleotidyl Transferase-Mediated Deoxyuridine Triphosphate Nick-End Labeling Assay*

BrdU labeling was performed by injecting BrdU intraperitoneally (0.2 mg/g body wt) (Sigma) daily for 2 consecutive days before the mice were killed. Alternatively, BrdU (0.8 g/L) was provided in drinking water for 2 days, with water changed daily. Apoptotic cells were recognized by TUNEL assay with a TUNEL Apoptosis Detection Kit (Millipore, Billerica, MA), following the manufacturer's instructions.

### *Real-Time Quantitative Polymerase Chain Reaction*

After harvesting, tissues were preserved in RNAlater (Ambion, Austin, TX) and stored until use. Messenger RNA isolation and subsequent complementary DNA synthesis were performed using μMACS One-step cDNA Kit (Miltenyi Biotec, Auburn, CA) according to the manufacturer's instructions. Primers were purchased from Qiagen (QuantiTect Primer Assays; Valencia, CA) and are listed in Supplementary Table 2. Reactions were performed with QuantiTect SYBR Green PCR Kit (Qiagen) using a LightCycler 1.5 Instrument (Roche, Branchburg, NJ). Reactions were performed at least in triplicate. Specificity of the amplified products was determined by melting peak analysis. Quantification for each gene of interest was performed with the 2<sup>-ΔΔCt</sup> method. Quantified values were normalized against the housekeeping gene GAPDH, which proved to be stable across the samples.

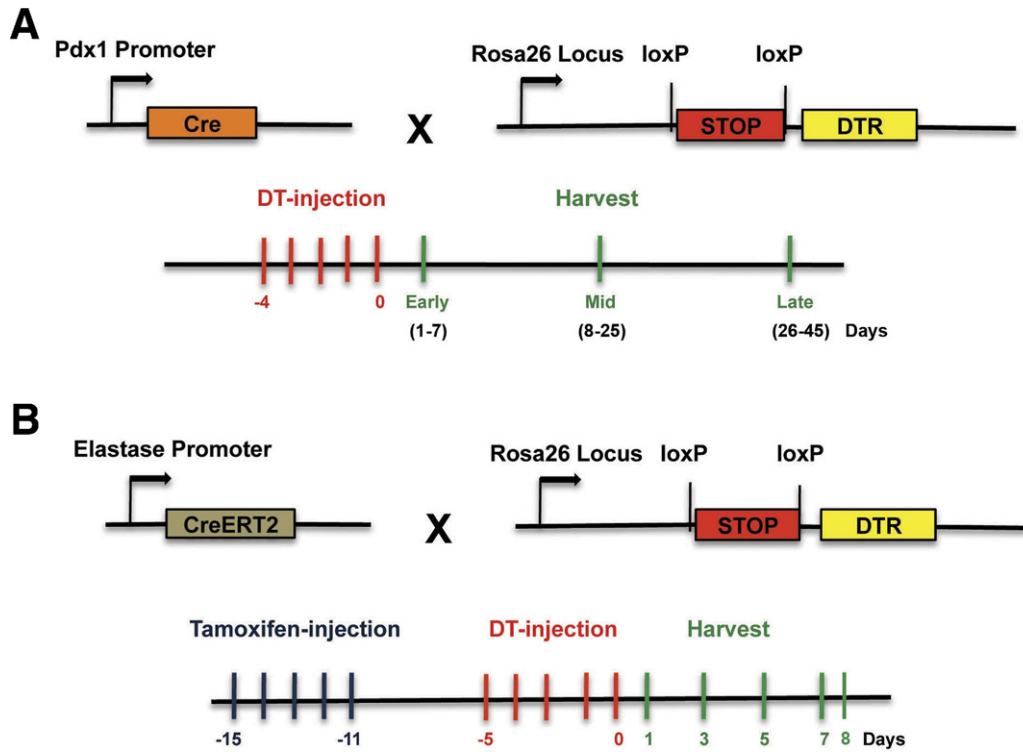

**Supplementary Figure 1.** Experimental design of the (A) PdxCre;R26<sup>DTR</sup> and (B) ElaCreERT;R26<sup>DTR</sup> transgenic mouse model.

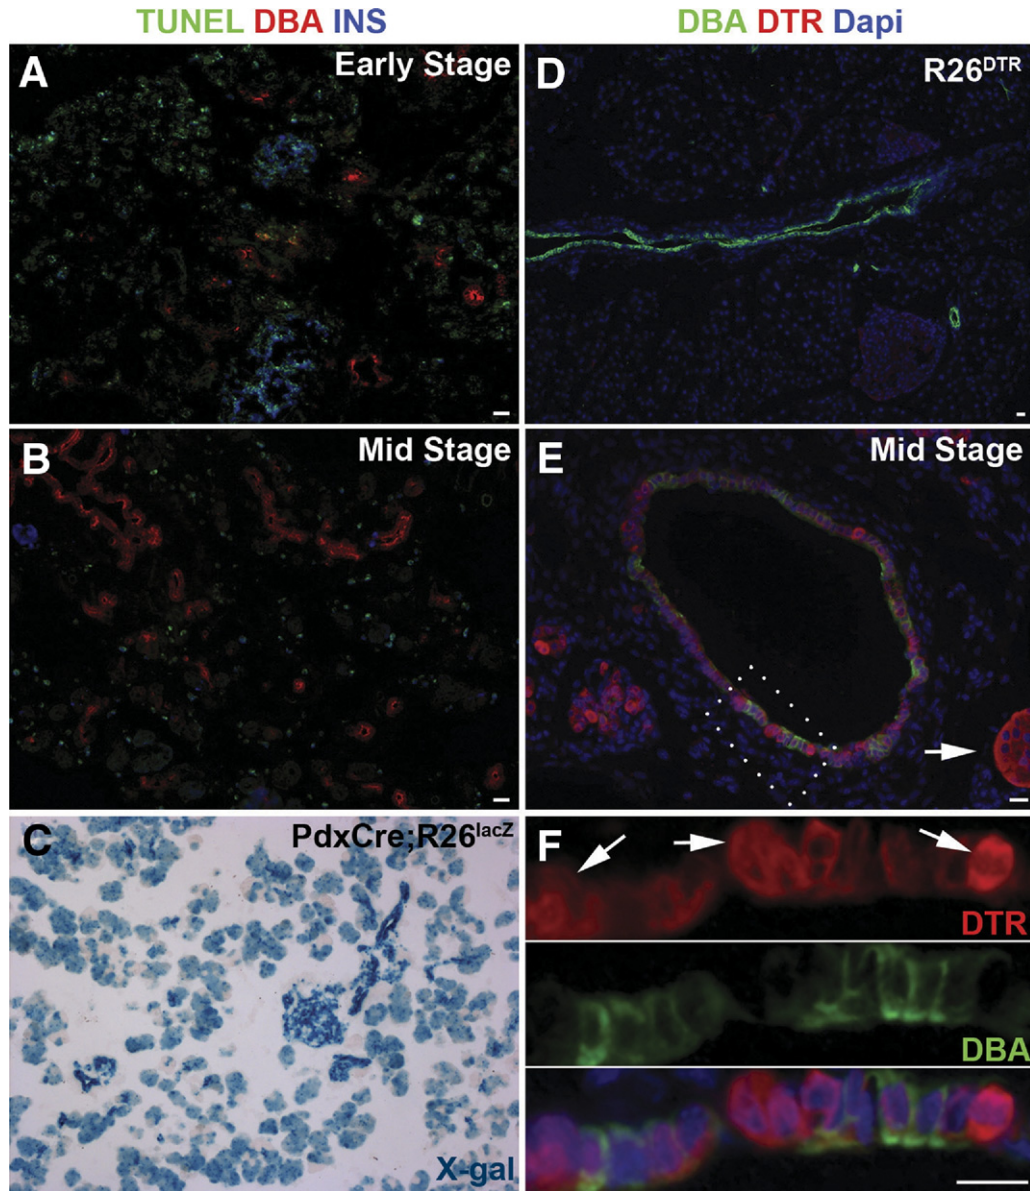

**Supplementary Figure 2.** (A) TUNEL assay in PdxCre;R26<sup>DTR</sup> mice. DBA/TUNEL/insulin triple staining showed a high level of apoptosis among non-DBA<sup>+</sup> epithelial cells (A) early after insult but (B) not during mid stage regeneration. (C) X-gal staining of PdxCre;R26<sup>lacZ</sup> pancreas revealed high penetrance of Cre-transgene in all pancreatic epithelial cell lineages in the PdxCre strain. Immunofluorescent analyses of sections obtained from (D) R26;<sup>DTR</sup> control and (E and F) mid stage regenerating PdxCre;R26<sup>DTR</sup> pancreas for detection of DBA and DTR revealed expression of DTR in DBA<sup>+</sup> cells. (F) Higher magnification of E. Arrow in E highlights a regenerated acinus. Arrows in F mark cytoplasmic and membrane localization of DTR in DBA<sup>-</sup> cells within the duct-like structures. Scale bars = 20 μm.

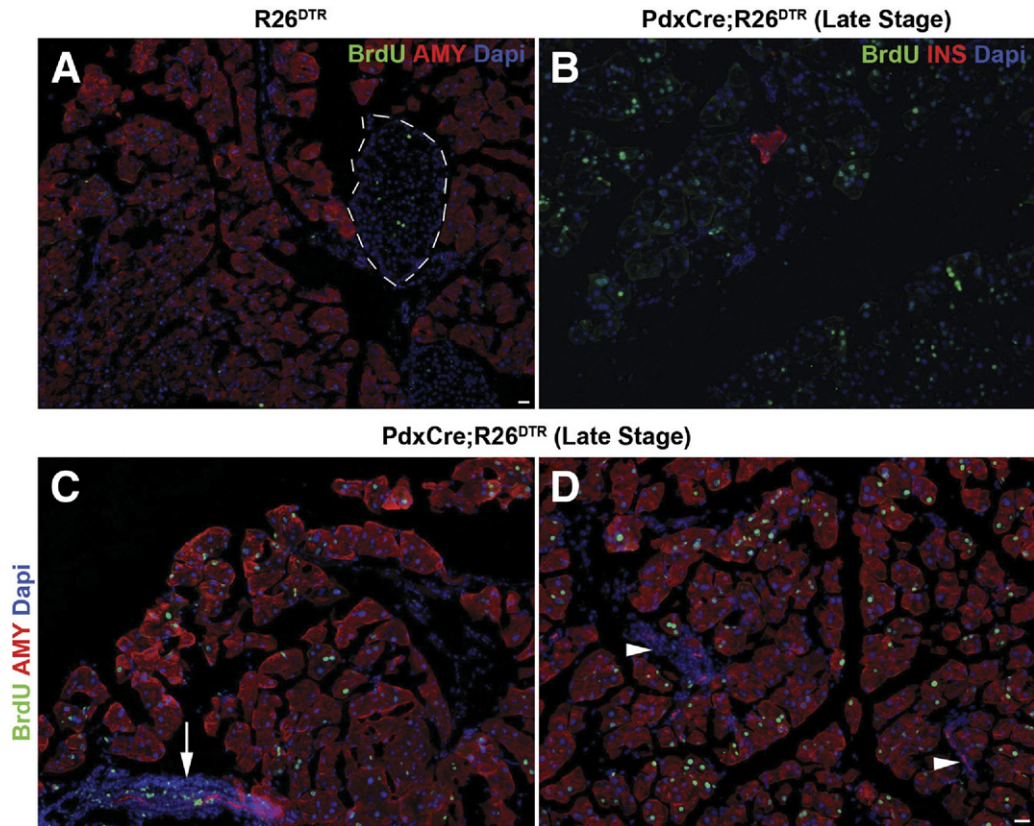

**Supplementary Figure 3.** Pulse-chase BrdU experiments. Immunofluorescent analyses of (A) R26<sup>DTR</sup> control or (B–D) day 30 after DT treatment regenerating PdxCre;R26<sup>DTR</sup> pancreas using antibodies against (A, C, and D) BrdU/amylase or (B) BrdU/insulin. BrdU was administered for 2 days on the day of last DT injection and the following day via the drinking water, and the pancreas was harvested on day 30 after BrdU withdrawal. *Arrow* in C marks a large duct with retained BrdU. *Arrowheads* in D highlight smaller ducts with no retained BrdU. *Dotted lines* highlight an islet. *Scale bars* = 20  $\mu$ m.

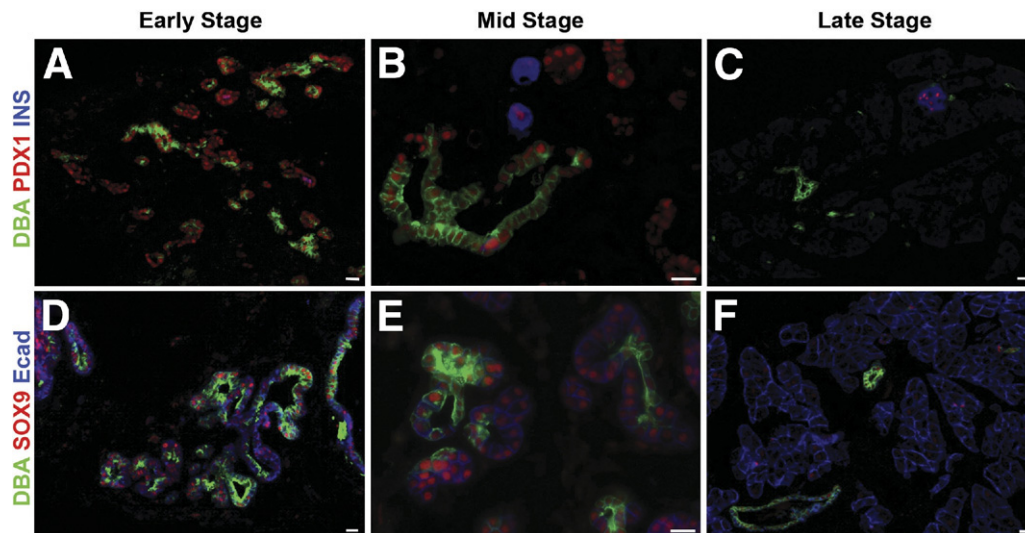

**Supplementary Figure 4.** Immunofluorescent analyses of sections obtained from (A and D) early-stage, (B and E) mid stage, or (C and F) late-stage regenerating DT-treated PdxCre;R26<sup>DTR</sup> pancreas for detection of (A–C) DBA/PDX1/insulin or (D–F) DBA/SOX9/E-cadherin. (A and B) In DT-treated PdxCre;R26<sup>DTR</sup> pancreata, surviving ductal cells re-expressed PDX1 in early and mid stages. (C) Notably, once regeneration was completed, Pdx1 expression was once again restricted to  $\beta$ -cells. *Scale bars* = 20  $\mu$ m.

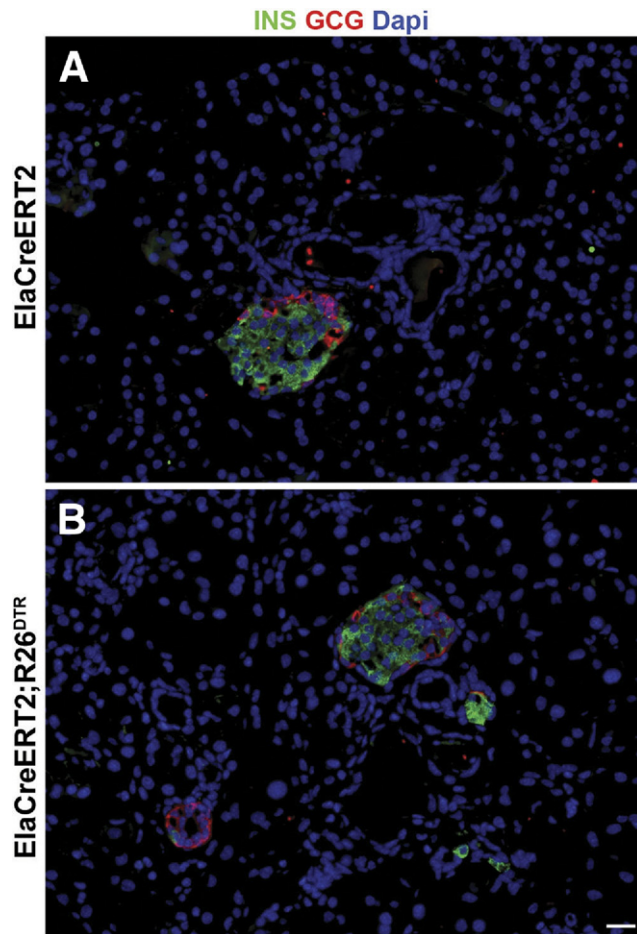

**Supplementary Figure 5.** Acinar-specific cell ablation in tamoxifen-induced DT-treated ElaCreERT2;R26<sup>DTR</sup> pancreas. Double immunostaining of tissues obtained from (A) control ElaCreERT2 or (B) regenerating ElaCreERT2;R26<sup>DTR</sup> pancreas using antibodies recognizing insulin or glucagon showed the survival of nonacinar cells. Scale bar = 20  $\mu$ m.

**Supplementary Table 1.** List of Antibodies Used for Immunofluorescence Analysis

| Antigen      | Species    | Company             | Catalog no. | Dilution |
|--------------|------------|---------------------|-------------|----------|
| E-cadherin   | Goat       | R&D                 | AF748       | 1:200    |
| E-cadherin   | Rat        | Invitrogen          | 13-1900     | 1:200    |
| panCK        | Rabbit     | DAKO                | Z0622       | 1:100    |
| CK19         | Rat        | DSHB                | TROMA III   | 1:100    |
| CD31 (PECAM) | Rat        | BD Pharmingen       | BD550274    | 1:50     |
| Insulin      | Guinea pig | Linco/Millipore     | 4011-01     | 1:1000   |
| Insulin      | Mouse      | Abcam               | Ab8305-100  | 1:500    |
| Glucagon     | Guinea pig | Linco/Millipore     | 4031-01F    | 1:1000   |
| Glucagon     | Rabbit     | Linco/Millipore     | 4030-01F    | 1:2000   |
| Pdx-1        | Rabbit     | Abcam               | AB47267     | 1:2000   |
| Pdx-1        | Goat       | Abcam               | AB47383     | 1:10,000 |
| Sox9         | Rabbit     | Millipore           | AB5535      | 1:1000   |
| Ngn3         | Guinea pig | Dr Maiké Sander     |             | 1:500    |
| Amylase      | Rabbit     | Sigma               | A8273       | 1:300    |
| Amylase      | Goat       | Santa Cruz Biotech  | Sc-12821    | 1:250    |
| FITC-DBA     |            | Vector Laboratories | FL1031-2    | 1:100    |
| BrdU         | Rat        | Abcam               | AB6326      | 1:100    |
| $\beta$ -gal | Chicken    | Abcam               | 9361        | 1:1000   |
| HB-EGF       | Goat       | R&D Systems         | AF-259-NA   | 1:500    |

NOTE. All secondary antibodies were purchased from Jackson ImmunoResearch Laboratories: biotin-conjugated anti-rabbit (1:500), biotin-conjugated anti-rat (1:500), biotin-conjugated anti-guinea pig (1:500), biotin-conjugated anti-goat (1:250); Cy2-conjugated streptavidin 1:500; Cy3-conjugated streptavidin 1:500; Cy5-conjugated streptavidin 1:100; and Cy2- and Cy3-conjugated donkey anti-guinea pig, anti-rabbit, anti-rat, anti-mouse, anti-goat (all 1:300).

**Supplementary Table 2.** List of Primers Used for qRT-PCR

| Gene   | Qiagen QuantiTect<br>Primer Assay | Catalog no. |
|--------|-----------------------------------|-------------|
| Notch1 | Mm_Notch1_1_SG                    | QT00156982  |
| Hes1   | Mm_Hes1_1_SG                      | QT00313537  |
| Mist1  | Mm_Bhlha15_1_SG                   | QT00315182  |
| Ptf1a  | Mm_Ptf1a_1_SG                     | QT00124187  |
| PDX1   | Mm_Pdx1_1_SG                      | QT00102235  |
| NGN3   | Mm_Neurog3_1_SG                   | QT00262850  |
| NeuroD | Mm_Neurod2_1_SG                   | QT00248892  |
| MAFA   | Mm_Mafa_2_SG                      | QT01037638  |
| INS2   | Mm_Ins2_1_SG                      | QT00114289  |
| GCK    | Mm_Gck_1_SG                       | QT00140007  |
| GLUT2  | Mm_Slc2a2_1_SG                    | QT00103537  |
